# Supplementary material for: Neglect of Legal Statute Influence on Health Outcomes in Studies about Human Cannabis Use
Source: Preprints.org preprint supplement (doi:10.20944/preprints202009.0417.v1), 2020-09-18
Supplement: Supplementary file 1 [file supplementary]

## Sheet: (cannabis OR marijuana) AND fun
(cannabis OR marijuana) AND fungi
29274621
29194121
29049523
29151103
28662388
29030980
28935932
28605305
28328553
28542366
28131519
27956269
27398989
27718074
28065255
27829351
27826829
27659898
27722705
27096166
27853518
27369551
27305347
27288550
27038180
27109234
27268054
27287596
26907475
26878606
26928774
26507533
26883889
26772776
27767974
26376114
26158599
27303623
26633823
26100839
26536481
26461494
26438587
26365444
25401955
25994576
25681375
26464763
26165663
26213534
26136759
25917103
26054900
25900076
25618446
26017563
25575888
25796370
25700110
25713087
25389027
25539046
25216851
24643444
25378491
25542687
25113915
25456709
26042266
25305029
25100187
25299291
25271293
25234368
24846733
24746767
25013976
25057822
24841204
25211989
25041153
23891581
24938323
24932479
24915846
24896848
24926322
24647014
24630433
24562630
24811031
24337729
24526276
24495605
24564954
23939912
25175871
25175866
24420864
24202177
23851307
23673792
24032625
23987832
23880102
23265089
23481299
22887894
22670566
23533904
23931799
23682981
22362568
22899554
22824479
22483531
22421529
22919826
22581874
22075921
22670707
22183836
21831965
22131117
21717292
21131094
21056582
21389334
21464965
21769046
21111616
21446607
22165737
21245619
20824270
20890652
21361113
19457575
19969046
20223485
20227217
20160270
20085530
19823977
19558465
19089648
19345076
19534600
19747102
20442839
19344127
19333876
19174735
19179508
19319199
19323040
19317344
18998051
19138182
18925443
18607305
22504718
18580821
18614923
18247131
18451367
18445848
18243785
18303850
18367980
18334711
18252924
18442305
18257429
17917699
18072830
17669365
23878651
17671191
17651027
16644197
17296917
17127636
16957511
16837556
18040805
16872369
18040792
18040791
16511370
17169039
16207246
16419392
15964028
15864274
15749859
15698640
16596782
15516380
15258190
15369590
15294950
15081488
15510238
15156600
15116696
14741443
14741435
14766437
14755785
12960289
14520179
12919408
12971670
12965999
12965981
12766871
12692094
14677902
12617697
12472631
12130702
12170126
12044989
12078330
11872997
11952264
11942684
11837688
11583659
11693922
11678659
11531412
11443551
11354264
11372796
11336118
11275676
11727770
11426925
11906077
11147983
11211544
11109425
10843702
10733093
10968598
10453814
9930161
9694974
9713909
9674459
9610679
9610678
9666275
9761937
9223115
9141290
9012363
8651947
8732433
8964654
7675800
7777582
7545349
16414764
8063421
7817542
7964576
8118892
8138942
8196497
8164509
8263818
8396073
8389328
8389327
8433070
8380060
8237611
8237609
7694448
1464288
1413197
1319584
1553925
1313999
1320592
1311105
1295542
1325494
1309398
1660230
1660911
1806952
1649242
1994248
1659141
1659137
1646773
2231436
2368776
2159920
2158486
2099446
3293934
2840802
2844686
2824957
3573283
2830328
3031322
3492678
3088660
3895718
6564901
17404934
6348548
6833678
7078603
7070444
7298870
6789127
7453776
81411
756832
657864
414138
1065215
945252
1152915
1094876
4217412
4756165
4198823
4121147
4326939
5524328
4883616
4880721
5753775
13927015

## Sheet: (cannabis OR marijuana)
(cannabis OR marijuana)
28427301
29182999
28939188
29107203
29078148
29065377
29045928
29032318
28992573
28941933
28756940
28755765
28952346
28926679
29174764
29111112
28641906
28937912
28820622
28813188
28777709
28777687
28777685
28777678
28742412
28915500
28889058
28889057
28886577
28886575
28863315
28858694
28846942
28843730
28843729
28820970
28756041
28755613
28753466
28738220
28735038
28734192
28645136
29283476
29280237
29211540
29161062
29161058
29164599
28730896
29069624
28984637
29220668
29172121
29132050
29120860
29112827
29095050
29053022
29082802
29216523
28991884
28846958
28899660
28270256
28768821
29257781
29057480
28965006
29224217
29227236
29169951
29192672
29192670
29192667
29192661
28875990
28875989
28857069
28853439
28845848
28811670
28745306
28847489
29266063
29156427
29120851
29100135
28508675
28967348
28655360
28095254
28783904
29284197
29282781
29282091
29282704
29281557
29279917
29279246
29272108
29277082
29273628
29273844
29277524
29277409
29272172
29271031
29267057
29268726
29265880
29261344
29266467
29273302
29161035
29261477
29261453
29275046
29263018
29262425
29262838
29265574
29265385
29255852
29273271
29267663
29255102
29252011
29250737
29248970
29249063
29258185
29247465
29254657
29253654
29248449
29240420
29247863
29247961
28035000
29237190
29236561
29229000
29233109
29229017
29230888
29233937
29253806
29223184
29226762
29232644
29248810
29276495
29229491
29227883
29227828
29218823
29220608
29220602
29248863
29218644
29212564
29227839
29218748
29202631
29268146
29274621
29112398
29227894
29210141
29223915
29220642
29204742
29207512
29203575
29199906
29199899
29202510
29206230
29223914
29197984
28756354
28711745
29105921
29105917
29105915
28742932
28696583
28646566
28623880
28623859
28556310
29084627
29083495
28940320
29125218
29064160
28921814
28987516
28712644
29173950
28843740
28886963
29116835
29223301
28286929
29096386
28728053
29182065
29251846
28853159
29064282
29064278
28872348
28956316
28711691
29154062
28918484
29107787
29107786
29080406
29055821
29054032
29045919
29040824
29028555
28866743
29057576
29132831
29031837
27468859
28867485
29057665
29237032
28285466
28286930
29102847
29028562
28957741
27723274
27480592
28970063
28970061
28942238
29199501
28677235
29045307
29045302
28987305
29194645
28664257
27921445
27924621
28675076
29052712
29253435
29190268
28885457
28885454
27248776
29122973
29109106
29109105
29128791
28964850
28965815
28886901
29199844
29199843
28905207
28900686
28595976
29194045
29169678
29126755
29122396
29092678
28969490
28816100
28810812
28381332
28372906
28472697
29157636
29225409
29238589
26389198
29194121
29073741
29198589
29194102
28892757
28841427
29067992
29191259
29189023
29190174
29189190
29189144
29189142
29096438
29197535
29185845
29185842
29216571
29179576
29183315
29185174
29191570
29207008
29176009
29172598
29178487
29176864
29173210
29180537
29172877
29191629
29202347
29192095
29176447
29168268
29213247
29224920
29049523
29162567
29173162
29173160
29160600
29169767
29161743
29174334
29161167
29161157
29209235
29159413
29159409
29152814
29153074
29151198
29151103
29165726
28448164
28409675
29156310
29145417
29144148
29144146
29118041
28947626
28944449
29153294
29142201
29072720
29146503
29134961
29136643
29138877
29145374
29134767
29180956
29146020
29131695
29127726
29146044
29125702
29176975
28077451
29124816
29137869
28704115
28605218
29128710
29120322
29109016
29153783
29117858
29038246
29117931
29117267
29117206
29112194
29126919
29116552
29110674
29109216
29105041
29110202
29105663
29107961
29109461
29117908
29149635
29128711
29131068
29101632
29113898
29103076
29103798
29101148
29108735
29099795
29101333
29094798
29125965
29094955
29096691
29106691
28841409
28648991
28618391
28595060
28570913
28558335
27578457
27151647
28990298
28990297
28613454
28600897
28600881
28600874
28547854
29094229
28975627
28635349
28448718
28402711
28747360
29019782
29019777
29069111
28826746
28810219
28803111
28662388
28800377
29093004
29059132
29045249
28644052
29065317
28799996
28636769
28958411
28988005
28972908
28961544
28950239
28942289
28942288
28938183
28926791
28917206
28892720
28886395
28850903
28952788
28789567
28845714
29028489
28942374
28957757
28888099
28886887
28818639
26795703
28976704
28120250
28885301
28799775
28355118
29096779
29180554
29180549
29092669
26514393
29035279
28169460
29099516
28818631
29144239
28888560
28771093
28548619
29023835
29110806
29110804
29087826
29087824
29021120
29021112
29021107
28787375
29064946
29145345
28220044
29085067
28958905
27613943
29093042
29061872
29092791
28729196
28705601
28668544
28652086
28603006
28528172
28365373
28242263
28232101
28803095
28846000
28558859
28733813
29267555
29096995
28189531
29109977
28886910
28827195
29096918
29084454
29095419
29097192
29163267
29084362
29083249
29075929
29077536
29126667
29072524
29073592
29074469
29075884
28498796
29107164
29076878
29079445
29067545
29064777
29063964
29058471
29109685
29058519
29058572
29058635
28981842
29066258
29053377
29065847
29052952
29058116
29134053
29089789
29049354
29044798
28973916
29044778
29038326
29053095
29034533
28646712
28433767
28557590
28524739
28471320
28471316
29030980
29037744
29035917
29030807
29022873
29025999
28931275
29066964
29066974
28694184
29023325
29019813
28984682
28988545
28991522
28991520
28991519
28987070
29031478
28986974
29201551
28838990
28983792
28984055
29123592
28981118
28983880
28983686
28981379
28978498
28734940
28669581
28642081
28324675
28916100
29087751
28981597
28544955
28525833
28511099
28475942
28463803
28431292
28412327
28891146
28762250
28762233
28449191
28009931
28923142
28898494
28834024
28708935
28457767
28927540
28957920
28578174
28826950
28810072
28550341
29200213
28423920
28704272
28268256
29098190
29098189
29098188
29098187
29269965
25367167
28948486
28031069
28846955
28846954
28844014
28797805
28779616
28763781
28763779
28763778
28756102
28755540
28753480
28750253
28240418
27693044
28821005
28314984
28605480
29048189
28817987
28927690
28846913
27416978
28819922
28810160
28810157
29025053
28520946
29058945
28152664
29147495
28903126
29200044
28755650
29090967
29056980
28170098
29056081
28661822
28943695
28772109
28600754
28074306
27013329
29198276
28464701
28935056
28935055
29039260
28867414
28847455
28846769
29095577
28803965
28358552
28443616
28272498
28937574
28937569
29026366
28602568
28893851
28361199
28704791
28622571
28464965
28424105
28645525
28645616
28865255
28910591
28832279
28762888
28726580
28704167
28686545
28622100
28640062
29142909
28753096
27782768
28983528
27749977
28811178
28960159
28960130
28965780
28960416
28952897
28946762
28954403
28950404
28951549
28948698
29038721
28945457
28979131
29017688
28937863
28933703
28933886
28983261
28933254
28934076
28993073
28935932
28933976
28931375
28942005
28806081
28971063
29046744
28926863
28925799
28524714
28430081
28921405
28923526
28977394
28634109
28564576
28527758
28414051
28392266
28373077
28915313
28915073
28910251
28905873
29025078
28910232
28910186
28910182
28905247
28928168
28939392
28895239
28895792
28900286
28953512
29152433
28891738
29115760
28889368
28917442
28884869
28887669
28884250
28874224
28888362
28912635
28806817
28806794
28806789
28870224
28609672
28874764
28868760
28865169
29025134
28954612
28866778
28922814
28870652
28715729
28554064
28453999
28399488
28391071
28388494
28388493
28340421
28319813
27027565
28778123
28660658
28430385
28419656
28387975
28387964
28513200
28481972
28667763
28654734
28872196
27929672
27820669
27808576
28483343
28692429
28548225
28729356
28780725
29098186
29082321
29022679
29022678
28967368
28867430
28494183
28739101
28732317
28728115
28715777
28711814
28711812
28704769
28686986
28667941
28666180
28654873
28654872
28651153
28647681
28646713
28645060
28641130
28641129
28641128
28624604
28439990
28317259
28317200
28244160
27349485
29119763
28957793
29266138
28802951
28778032
28759479
28667878
28648353
28863721
28504027
28796120
28727662
28700366
28614161
28590392
28483299
28838579
28718398
27858495
28783970
27876440
28272095
28597943
28261791
28699829
28682218
27222240
28766314
28778368
28392338
28930067
28930065
28930056
28755772
28534150
28220280
28932790
28750823
28750822
28759769
28370445
28579491
28858148
27986504
27794547
28934780
28796137
28845622
28808073
28655644
28729199
28800805
28953820
28949308
28521146
28891662
28805408
28703615
28595088
28796754
28610933
28886958
29267657
29034118
29156899
28783932
28858430
28876407
28857637
28853020
28207408
28130957
28846065
28846058
28899566
28890707
28847562
28835305
28843425
28843438
28406351
28394735
28836314
28866904
28878698
28835980
28832666
28833738
28830504
28417566
28829279
28855796
28916143
28821523
28821296
28822116
28095031
28816239
28823723
28818114
28816599
28815876
29104427
29035491
28449059
28479140
28453948
28806104
28804966
28811049
28571738
29083450
28799883
28799497
28797270
28796166
28799512
28792113
28795205
28793355
28792283
28784163
28579487
28824464
28776865
28777692
28777688
28771096
28771966
28767275
28983445
28231494
28239995
28127808
27759944
28400309
28495855
28700290
28644037
28640680
28640679
28751294
27920061
28677901
29082320
29082319
29082318
29082317
27796624
28806166
28738036
28548223
28735833
27417425
27322037
28050780
28662974
28623823
28609722
28600928
28599214
28599212
28599211
28582698
28549263
28035764
27720453
28238173
28663122
28576350
28782982
28682102
28627927
28609661
28906233
28560818
29265019
28391965
28138971
27848262
28592420
28053188
28759320
26385975
28405831
28325681
28741423
28741422
28648138
28631526
28432335
28188639
28673527
28589340
27830403
28741551
28705600
28705599
28259650
29185555
28746100
28682987
28648819
28679557
28482196
28703616
28249639
28040884
28567696
28536866
28508921
28397998
28709516
28655453
28528115
28760836
28975065
28788104
28975060
28758944
28794966
28605305
28605216
28524716
28752650
28755247
28968046
28749704
28767469
28678776
28761794
28755764
28739851
28739850
28735586
28755766
28734078
28785210
28815220
28726525
28726520
28753919
28723312
28723278
28723265
28716846
28715253
28749527
28492954
28492950
28170052
28708013
28710057
28850198
28749524
29016917
28749523
28717382
28707583
28695562
28693460
28695243
28694530
28697856
28686594
28683783
28686820
28678683
28678649
28681196
28681195
28431313
28677506
28676471
28486029
28095034
29106649
28323506
28323502
28323498
28556886
28168698
28232290
28214742
28214740
28214433
28182965
26934839
26860848
26860734
28586550
28477353
28393418
28393411
28301070
28206689
28194819
28194818
28192643
28155251
27891693
28456895
28417252
28285434
28213820
27714523
27475945
28006972
28470846
28301219
27612527
28413906
28395129
28762285
28466235
28347716
29082316
29082315
29082314
28752748
27720917
27623111
28459730
28544995
28531769
28531767
28514695
28514694
28511034
28511033
28185327
27732768
28456476
28502714
28463706
28402427
29085083
28736968
28761199
28328553
28441272
28215580
28416341
28830124
28633318
28802317
28802316
28661957
28622159
27533106
28700762
28911631
28494249
28820771
28455844
28605163
28953315
28398690
28237885
28632077
28632075
28441106
28406348
28266899
28134030
28522231
28728634
28728633
28840009
29200533
28652035
28668480
28478594
28328576
28529018
28501518
28232276
28543168
29072187
28441618
28395231
28395229
28179039
28166863
28424834
28424833
28401285
28364340
28458121
28692384
28637382
28586627
29160436
28969353
28065484
28550519
28594607
27715709
27482999
28775950
28924351
28662170
28669582
28170051
27749974
27749969
28668338
28701957
28701974
28655704
28690588
28641496
28640922
28680401
28635664
28639209
29065199
28690839
28631315
28494058
28627903
28621645
28620722
28252543
28617105
28495606
28613973
28815938
28612213
28627395
28606210
28562230
28606093
28619395
28600490
28634543
28586333
28615950
28615949
28615948
28584049
28584048
28680622
28391091
28129611
28110137
28650230
28421617
28456010
28426146
28370717
28314070
28161344
28541996
28320226
28498750
28426314
27995548
28541729
28254633
28125508
28366826
28861516
28861515
28861514
28861513
28861512
28861511
28861510
28595684
29104847
29062679
29057200
29057199
29057198
28432636
28566118
28349233
28448904
28432939
28411561
28407543
28364629
28570781
27647820
27590030
27426892
28437124
28582498
28412575
28412574
28630559
28572268
28511107
27658846
27356948
28446040
28318911
28242187
28202303
28619859
28727050
27918106
28764226
27753292
28682530
28252880
27552530
29123972
27351764
28382464
28353201
28283940
28472734
28497234
28471927
28370603
28644751
28573421
28536744
28527026
28500615
28484894
28477299
28470448
28456861
28455643
28451984
28129565
28418321
28476279
28476263
28259500
28216197
27718034
28445570
28445557
28498005
28571820
28230072
28059083
28562268
28370228
28189806
28254578
28437121
28414475
28414474
28301181
28516232
27989645
28648193
28648190
28120116
28595208
28558858
28578812
28560499
28553995
28340425
28554946
28611591
28607542
28607541
28547821
28549161
28552942
28607917
28599377
28537159
28535815
28544367
28534260
28579820
28525609
28526973
28542366
28545099
28418460
28384665
28346947
28512087
28223098
28827985
28555119
28503792
28344069
28498718
28515137
28372838
28506926
28506705
28506704
28379109
28145805
28145799
28145794
28650597
28489512
28439004
28481624
28482686
28485092
28483743
28487076
28496355
28476338
28391472
28605924
28088742
28088055
28088054
26769333
26752416
28010052
27886657
27590043
28247416
27689787
27292878
27211100
26559715
28342528
28233028
28595738
28588361
28212939
28089557
27707642
28861509
28861508
28861507
28303445
28212173
28516445
28365173
28329719
28324814
28319753
28319752
28314193
28282523
28273647
27464485
27400773
28493273
27349582
28254350
28254349
28238865
28237318
28202406
28190698
28188044
28169144
28132734
28109780
28089286
28087250
27989385
26420845
28341798
28351169
28622813
28424215
28597570
28557129
28557062
28395168
28343113
28222305
28189980
28379861
28252456
28011065
28069869
27497677
28639495
28403747
28285869
28283304
28274644
27957741
27957736
28544336
28498631
28263690
28638299
28103519
28372506
28196428
28382671
28382670
28382667
28499114
28499110
28499099
28162849
28159441
28131519
28093667
28320602
28549545
28372714
28489809
28039093
28219717
28434588
27639448
28422803
28274851
28249817
28444659
28413856
28349235
28337693
28214781
28182448
28065168
27510542
27481827
27431873
28389616
28389613
28389604
28540039
28448475
28490916
28444789
28439922
28487656
28441090
28384774
28441459
28434211
28428375
28429160
28425102
28613573
28613552
28422352
28422145
28343385
28427930
28412950
28427768
28140729
28242498
28213124
28193575
26389314
28402002
28435268
28469427
28383108
28382461
28376639
28375809
28368707
27889412
28038364
28124470
27896905
27865015
27905014
27738780
27260179
28295843
27908791
28207342
27723946
28318181
28242150
27587262
28167133
28263083
28861506
28861505
27956269
28548575
28231480
27632815
28281107
28349316
28080082
28283211
28273616
28259087
28219802
27341312
27336666
27339798
28285234
28210835
28276775
28276820
28283378
26556839
28377052
28366598
28366597
28365192
28336000
28314644
28209284
28190671
28189912
28189459
28173984
28171805
28107687
27908654
28582351
28259098
28182979
28043754
28335878
27639866
28368694
26822557
26822474
27929312
28097606
28415145
27128492
28426332
28314553
28146248
28438101
28422859
28224333
27582345
28185872
28138895
27834103
28170389
27911435
28348201
28289139
28289138
28152399
28142064
27928975
28160034
28147409
28110213
27793551
27765413
27133469
27061044
28262326
28394736
28402578
29085867
28983497
28363885
28371432
28367308
28355238
28385868
28356240
28351544
28192758
28341617
28165233
28333100
28333097
28240903
28392993
28240291
28400711
28010173
28010167
27849430
28385722
28373843
28335531
28220762
28367124
28318754
28188220
28293994
28296885
28291877
28288999
28340185
28295524
28283038
28344554
28277943
28339800
28275000
28273162
28285022
28212013
28264690
28272561
28262852
28081435
28065934
27979332
27930900
27918997
27894029
27889563
27871045
26732435
27741369
27767235
27743424
27741562
28191917
28152236
28004866
27901585
27494436
28277253
27561924
28215274
28215273
28248584
28289112
28442116
27730759
28176545
28252368
29235818
28515817
28235999
28861504
28861503
26912785
28188235
28188234
28263455
28254070
26912022
28245077
28088032
28081515
27296783
27073179
27004985
27723182
27766914
25801164
28122324
27815393
28190670
28139329
28063279
27988428
27981662
28344426
28012834
28049102
28219487
27871617
28158482
27798074
27798073
27865819
27610597
28249060
27864949
28235697
28661291
28000146
27686239
27599520
27541956
27139708
27718772
28245177
28317514
28317509
28317500
28132699
28272189
28328830
28290934
28236096
27981374
28104530
28566957
28250701
28242859
28189373
28152465
27821204
28240035
27745898
28548193
28029515
27590573
28284435
28109727
27924008
27052097
28162799
28162792
28095988
28089139
28130165
28242592
28108383
28225673
27779445
27768528
27767370
28228447
28229368
28112021
28278609
28261148
28092168
28216068
28088044
27673500
28194606
28397674
28190094
28199700
28187774
28184877
28179227
28178207
28176511
28690830
28166472
27321747
28159848
28217094
28153816
28152062
28157276
27984814
27768917
27723510
27701026
27592055
27544696
28078706
28074568
27515021
27482893
27454239
27442009
28073157
27590896
26377551
27593602
28075636
27997245
28145759
27815614
28222475
28262143
26769978
27679634
28027538
27605579
28861502
26733534
27919534
28084644
27861784
27859024
27727455
27506704
27367612
27855334
27816801
27482533
28086176
28063338
28024188
28012429
27161591
27862053
27496769
27792038
28043732
27936816
27400329
27581837
27743873
28321133
28079617
27955825
27699626
28457058
28457056
28457055
28457054
28056357
27769761
28117060
28117058
28166690
27617793
27918316
29118149
26545600
26321356
27836813
27846066
27579692
27863280
28083726
28098679
28027345
28027336
28027335
27079840
28204792
28226335
28451030
27660328
28150062
27534665
28126071
27893214
27893213
27056274
28088618
28028147
27799014
27234314
28035648
28146616
28101559
28451023
28246322
[truncated: 24,674 more rows]

## Sheet: (cannabis OR marijuana) AND pro
(cannabis OR marijuana) AND prohibition
28652086
29044778
28810157
28884869
28886958
28259650
28739850
28544367
27989385
28366598
28189459
28063279
29044015
28075542
27292414
27296756
27694657
27178873
26986906
25630540
26703880
26800050
26777400
26655490
26605550
26206230
26752030
25677377
25181993
26126326
25287942
25403234
24853283
24746863
24825201
24765558
24180513
23647529
23591511
23278122
23435185
22991092
23036654
21985069
22305029
21906196
22080902
21985215
21803006
21615008
21045035
20929918
20857386
20148792
20618944
20331549
20506447
20331566
19303761
19452363
19293714
19262386
19320694
18622072
18412748
17854725
17712818
17266759
17558947
16456761
22013336
16234129
16234128
16234126
16234125
15289511
15370030
15216838
15108659
11569976
11295320
11157425
11957388
11366533
11039824
9374007
16203391
8969018
12289001
8907406
7896469
8146243
2793278
2638935
3535959
6570647
14954212

## Sheet: (cannabis OR marijuana) AND pes
(cannabis OR marijuana) AND pesticide
28820005
28761199
28602505
28609661
28472697
28334066
28343113
28173984
28223891
27866061
27764541
27683558
27595371
27366949
27316720
27317300
27246161
27078864
26926078
26896168
26930818
26558460
26642910
26556726
26536481
26215119
25976369
25944981
25447325
25413634
25131683
24889926
24859075
24752696
24963491
24373905
24361246
24216262
24211785
24041123
23933531
23761300
23722959
23597510
24116667
23737769
23317040
23098108
23106547
22236282
22805989
22784865
22571976
22508459
22421165
22166891
21915950
21867920
21672545
21667946
21507991
21172340
21049984
20962050
21341672
20434283
20514518
20335515
19891216
19531696
19496046
19201418
18989636
18687956
18565728
18538428
18365879
17720543
17476482
17117800
16956707
16730696
16756885
16717031
16310817
16243304
15182777
12944586
12872179
12243867
11897971
11884237
12216063
11350214
11374162
11123616
11225736
9798496
9737553
9602947
9141290
9111096
11363969
7749772
7881216
7945437
2406511
2511861
2840722
12341906
6097886
6859364
7089574
6265855
6112723
6913415
7375399
7357110
541644
221981
454949
479338
461956
760432
108181
360833
691192
736697
699654
699640
699639
258606
663666
671232
276671
661944
844609
4612300
4655051
4674983
4260786

## Sheet: (cannabis OR marijuana) AND psy
(cannabis OR marijuana) AND psychosis
29174764
28875990
29156427
28967348
28655360
29284197
29279246
29247465
29254657
29227894
29096386
28965815
28886901
28381332
28372906
29073741
29179576
29191570
29207008
29161743
29174334
29146020
29117908
29101333
28644052
29092669
29064946
28220044
28803095
28558859
28189531
29075884
29063964
28981842
29066258
29065847
29052952
29201551
28762250
28762233
25367167
29058945
29056980
29039260
28464965
28424105
28965780
28634109
28392266
29152433
28888362
28806817
28660658
28419656
28729356
28624604
28957793
28759479
28682218
28949308
28521146
28595088
28858430
28878698
28832666
28822116
29083450
28792113
29265019
28648138
28705600
28705599
28259650
28482196
28249639
28758944
28735586
28717382
28707583
28697856
28556886
28168698
28182965
27612527
28402427
28395229
28179039
28166863
28969353
28065484
28635664
28613973
28161344
28320226
28861514
28861513
28566118
27426892
28318911
28254578
28578812
28340425
28506705
28476338
28212173
28341798
28639495
28103519
27481827
27431873
28548575
28231480
28335878
28368694
28185872
28138895
28142064
28335531
28285022
28264690
27741562
28245077
28049102
28219487
28132699
28566957
27821204
28029515
27590573
28112021
28190094
28157276
27515021
28262143
27605579
28084644
27367612
27816801
27863280
27810713
28826533
27964871
28815091
28075172
28412916
28580227
27883946
28848170
28331504
27705819
27624146
27719666
26768595
27789118
27888680
28711226
28653514
27814886
28560246
27539930
27462088
26875104
27628967
27591408
27866486
27853201
27877130
27490838
27859664
27680429
27235082
27534999
27033329
28898309
28898308
28898305
27637389
27770820
27745717
28740820
25263663
27998264
27567467
27567466
26845349
27523641
27452108
25066783
27344379
27554198
27499362
27717258
27344587
27248185
27599617
27592556
27267317
26884547
27289213
27538886
27513670
27536254
27536110
27138587
27102239
27423358
27261878
27161263
26182894
27161604
27561138
27379411
27068569
27473688
27413997
27391407
27009572
27015036
27710762
27779447
27179124
27052366
26820171
27138828
26345478
25991762
27254846
27337422
26965714
27016880
27228985
27257547
27165643
27147666
27095338
27036127
27249079
27052382
26987641
27027272
26536902
26422191
26970364
26970363
26970362
26970361
26850792
26549491
26386480
26344755
27038079
27070732
26883305
27063384
26670601
26876313
27369687
26963912
26944875
26940105
27399223
26990266
26849855
26286531
25630540
26842658
26777297
26777296
25982082
26610039
26568030
26621349
26785806
26882038
26862498
26582409
26773991
26781550
24739233
26881768
27215115
26674214
26876401
26577065
26510450
26720073
26346639
26467909
26630993
26718334
26809975
26544611
26515984
27777807
26567470
27587204
27568729
27549375
28492376
27089154
26286840
26898326
26370602
26353818
27307782
26294706
26682958
26626949
26692885
25913109
24673851
26475577
26500166
25028364
25652342
26522870
26342514
25979486
26727010
27336809
26560802
26553191
26631302
26555499
26084677
26411531
26424432
26464454
26469212
26316595
25972235
26311150
25959502
26359848
26260081
26235754
26232243
26235479
26235475
26388066
26384217
26324307
26001662
25990303
26317561
26554181
26196459
26394507
26237286
26489068
25829376
26006253
26154815
26071625
26050011
26248719
26068702
25979516
25855064
25709097
25804288
25727300
25680837
26218967
26209238
26147948
25572323
26166234
26202542
26303540
27336035
25804977
25654244
25912376
26300595
26103030
25943979
26014623
25704358
24274357
25123065
24689505
25890850
25534593
25868934
25954940
25510948
25974923
26360275
26360274
26360273
26360272
25249057
25217481
25801237
25680767
25987916
25779033
25939318
25875862
25849623
25927125
23491968
25684263
25682479
25679128
25229417
25825416
25790002
25560193
25821437
25739398
25375878
25614532
25768856
25586398
26359901
25751443
25084213
25543118
25031222
25011381
25667194
25600549
26312901
25694180
25651990
25518844
25624312
25139064
25510926
25653831
25285897
25287883
26287755
25838957
23518784
25801838
25532865
25541346
25284334
25174270
25600541
26417473
26357916
26513726
26458187
25716487
25774457
25277095
25540036
25175914
25439055
25500598
24467257
25116043
24485144
25262418
25066001
25412332
25477825
25386644
25426017
25296631
24819935
25220897
23879875
24957864
24804834
25717480
25065544
24367897
25694282
24345517
25314586
24976457
25065535
25590545
24974080
24878296
25324787
25309363
25217674
25320613
24943123
24913137
25242813
25242812
24682777
24343109
25055169
24745470
24509089
24914878
24882185
24338111
24930951
24924407
24924403
25082422
25101008
24380726
24239593
23916409
25093472
25327006
24365456
23884348
24837058
24831390
25095582
24571736
24578446
25767748
24028906
24629712
24904437
24860514
24628830
24589980
24224849
24941587
24589887
24385130
24813404
24762846
24605939
24286498
24461684
24398065
24560431
23820822
24715366
24438181
26427297
24565363
24382686
24200867
24605853
24495605
24675448
24770572
24262129
23071001
23701858
24262665
24453492
24128684
24427139
23445265
25140221
24471373
23739313
24627297
24183888
24001294
23829369
23829367
23829359
24006213
24309088
26226970
24176513
24574553
24762642
24447985
23867051
25372557
24481081
25391710
25116129
25392292
25392062
25391280
25391279
25306780
25471704
23710972
23590927
23461899
23830215
24309013
24275582
25127003
24927026
23330571
24289797
23916322
24483000
25278734
24060266
23822951
24579344
24200416
24189290
24054726
23919899
24223116
23868928
23906840
25007532
24118193
23414608
23756588
24025696
24131496
24137134
24133461
24133460
24132898
23604786
24012078
23820464
23791616
24137768
23863130
23339857
23958486
23954148
23932663
23891482
24096775
24084427
23860356
23628289
23733714
23784738
24108182
23543339
23810133
23684550
23806582
23746486
23936196
22749891
23291208
23881886
23298518
23818084
23040144
23684162
23672820
23611242
23507458
23341473
23609387
22624828
23020923
22850401
23570896
23052424
23617875
23580381
23673914
22404861
23695790
23541998
23220619
23458778
23171473
23888577
23517662
23298386
23216690
23656852
23290558
23497439
23610773
23592072
21054691
22971158
23414492
23404388
23043552
22118812
23532749
23303471
22476511
23314189
22037770
23447438
23381649
23436669
22226049
24648785
23042939
23109356
23361397
23361396
24051590
25860308
23419236
23042808
24124774
23187069
23182442
23178107
23577904
23327506
24242146
22920791
22818174
22959686
23108553
23212141
22990432
22833579
22961922
22290123
22716931
23983983
22831980
23786516
22682680
23139065
22285366
23218162
22077343
22511328
22394476
22243563
22074909
23408483
23083027
22596206
22910403
22981049
22833577
22472772
22368242
22980477
22824736
22452790
23160053
21525167
22045103
22897939
22486607
22425410
21616646
22847056
22595870
22801822
22402706
22727454
22695256
21901400
22436347
22759464
22691010
22242792
22673951
22151745
22151583
22530798
22434221
22707958
22149956
21999906
21389110
22128839
22394457
22498950
22436394
22197045
22118368
23125956
22193527
21557880
21879797
21899795
22336955
22321667
22832859
28299079
22230356
22447803
22160733
22418399
22675784
22510918
22622252
22258882
21908795
20660494
22216747
22304609
21851445
22311529
22168625
21741803
21926420
22085776
21798112
21885130
22273390
23185814
22225671
21883099
22213786
22716161
22716160
22716159
22716158
22716157
22716155
22716154
22716153
22716152
22716151
22716150
22716149
22716148
22716147
22716144
22716143
22716142
22716140
22716139
22716138
22716137
22716136
22716135
22716134
22716133
22239586
22239577
23279181
22354141
21890594
21768161
21768160
22378193
23421098
21676285
21684614
22204498
21073668
21755554
21999698
22137215
22352284
22048912
21999503
21947654
22032548
21742345
21775978
21557896
21477418
21778038
22007164
23983854
21466750
22007163
21316162
20388719
21878786
21876221
21894134
21885577
21676284
20223841
21745727
21906002
21439652
21665293
21636134
21851228
21543822
21877303
21296361
21530584
21624823
21592732
21801441
21555157
21508437
22135433
21459559
21678345
21231925
21300939
21809727
21702397
21412224
20925969
21498049
21560079
21535423
21674887
21172414
21494164
21318938
19915168
21502264
21305693
20851410
21256719
20813412
21219257
20951979
21363868
21363867
21355926
21150914
20529412
21186097
21036542
21035979
21297046
21078705
21041608
20921112
20043146
21071184
21267359
21087649
20199489
21272011
21219495
23055415
21431002
21389167
26954911
20488461
20864293
21755008
21462790
20346196
21646823
22074578
21109040
20971608
20826079
21092168
21319400
21068828
21390411
21036986
20554292
20237882
20842617
20839158
20624444
21189528
19386576
20493536
20669315
20884962
20529414
20631688
20018124
19995476
20920183
20634371
20807965
20438810
20653616
20653615
20653613
20653612
20478874
20877748
20636193
20849327
20631559
20715473
19917142
19891810
20580531
20615208
20381329
20483565
20471224
20514567
20331568
20158435
20590561
20513854
20178067
20644687
20494266
20562767
19824986
21210319
20439399
20194820
20565524
20536971
19900684
20512269
20512267
20056392
20018470
20233914
20357313
20499454
20137846
20234785
20180725
20370967
19944543
21625378
20331929
20232511
20146152
20173266
20145493
19924114
19944561
19962862
19923008
20196426
20192802
20073570
19932824
20954427
19783132
20178093
21274356
19900791
19897342
20391271
20458676
20001415
19949195
20141773
20141772
20004284
19633959
20104292
19947784
19627645
19956405
19832786
19797432
19629449
19529920
19539765
19604646
19324499
19299087
19794196
19609589
19572159
20155601
19835316
19335936
19640690
19748375
19787023
19560900
19481424
19427172
19183816
19750250
19750249
19301164
22640386
19829990
19586351
19594792
21938097
19326102
19428219
26953749
19268481
19324529
19440079
19566775
19017430
19582316
19374969
19378381
18608451
19349314
19367509
19630315
18606046
19167194
18808401
21352178
19194646
18995970
18805673
19124693
19059508
19689331
19155808
19306615
19034727
19606270
20190358
19752588
19904712
18953330
19087477
19087476
19087475
19087474
18774699
18585009
18809298
18774264
18575790
19014732
18981338
18981337
19032716
18978312
19039723
18698000
18723841
19073418
18768298
18796281
18452569
19193352
18185500
18205966
18005495
18787592
18847572
18847570
21352151
18449850
18681755
18387788
18646115
18620563
18489616
18924561
18590475
18298880
18654956
18482435
18482434
18515902
18717266
18473254
18024467
18358595
18378995
18349870
18685302
18516951
18332661
18278990
18421812
18421811
18298878
18298877
18298876
17614260
18248793
17525974
18788083
18389647
19080993
18787359
18765960
18362877
18443664
18560513
18257429
17544588
17852064
18162026
17884351
17683911
17905522
17980732
17980730
17980729
17980727
17924247
17921757
17925811
17337748
17923665
17898360
18357854
17927477
20680137
17767429
18282438
17630260
17624977
17624969
17712818
17380464
17566707
17662880
17662860
17662859
17688012
17551355
17653295
17376259
17288638
17556751
17462864
17239356
17541112
17703707
17383738
17645056
17508295
17493110
17240501
17415074
17363221
17407429
17355521
17362293
17362287
17362286
17288646
17370045
17289155
17342632
17278907
17450404
17332810
17222264
17354536
17207121
17691420
17902120
17349865
17592163
17592162
17245472
18229729
18074881
17895537
27397348
27397346
27397343
27397341
17201620
16936704
17005373
17347125
17118250
16968350
17119495
16953519
16793142
16854250
17073176
16806837
16836598
16880483
17007223
17007222
17007221
16980745
16958576
16967754
16834826
16756582
16680211
16648530
16612208
16585472
16612464
16641831
16894861
16052245
16531099
16556300
15972246
16595355
16476154
16507965
18254461
16460917
16455740
16455739
16476127
16420097
16298107
16439632
16424501
16424500
16427475
16465938
17127556
16640112
17088227
16506412
17058779
16636640
16319402
16319805
16335031
16125368
16198239
16198238
16199787
16673704
16148439
16088340
15996143
15976013
15947217
15918820
16018929
15820332
15866551
15880155
15847630
15847618
15934852
15920395
15920390
15995876
15892983
15804348
15682431
15900804
15721218
15780846
15733249
16639166
15871146
15867975
28091016
27407730
15698675
15801394
15704027
15574485
15630129
16060598
16060596
15671136
15290008
15715818
15763749
15763748
15599103
15611887
15570532
15517706
15369576
15369575
15369574
15369572
15493085
15493084
15458997
15458989
15560324
21206788
15381886
15173844
15233568
15211397
15369211
15369205
15787208
15198471
15235513
15049754
15049753
15049752
15049742
15129466
15298320
15157061
14984893
14984874
15077386
15077376
15057830
14754822
15112899
15061244
15061243
15521792
15325960
15022049
14609885
15029086
14626837
14660156
14557527
14710528
12873326
12944690
12923677
12923676
12821204
21206852
12826918
15185645
12825760
12768520
12663845
12952500
12587850
12537033
12537032
12537030
12404071
12413646
12406123
12438838
12446537
12411264
12225495
12386625
12390237
12181101
12116185
12133119
12207131
12003681
12051322
12053879
12111342
12027532
11950549
11939970
11817767
11972143
11850048
12693430
11791535
11784457
11824094
11758656
11815690
11566433
11584686
11506766
11606002
11399112
11295320
11352368
11353438
11315227
11157424
11136641
15111259
11839138
11152013
11015816
11037376
11109687
15990489
10954410
10954409
10979421
10881971
10951902
10860095
10883147
10741225
10699229
11185941
10653215
24921450
10897680
10598296
10683620
10575282
10445962
10509615
10483847
10394036
10435771
10190230
9988095
10195343
10221641
16203510
11281947
9623218
9623217
9590675
9623095
9657061
9622791
9568931
9475841
9507595
9477606
9337942
9135947
9140641
9165630
9050118
8912803
9036403
8854296
8844760
8696249
8807030
8711563
8794495
8811260
8706627
8756056
8719500
8710994
8551852
8600581
7580514
7480371
7613377
7609813
7632625
7580227
7481568
8658102
7994524
7986773
21743686
8202016
8050773
8009723
8161287
8038954
8199803
8146942
8147425
8306122
8298853
8290984
8075903
8377742
8372691
8480822
8477216
8435708
8251538
1358394
1362227
1591584
1615105
1554995
1546548
1792558
1761271
1932878
1919560
1878628
1647392
2017910
1987823
1834188
2218786
2245273
2380692
2204462
2368637
2178712
1970451
2333480
2682130
2669170
2797336
2599683
2787581
2597866
2785829
2784368
3293670
3384605
3338231
3479165
2821778
3497393
3753161
3019373
3016488
3488781
3488755
3520605
3485984
3490891
3510197
3009708
3000137
3873170
6522310
6097886
6332510
6424863
6147913
6423193
6608715
6148769
6324549
6605777
6606553
6635638
6414012
6618409
6295192
6129463
6983205
6136401
6982382
6984728
7310924
6779177
7354312
6775232
451944
29496
100034
34102
411040
863562
834686
1016011
1051411
990781
988462
979454
979453
999496
958151
1066143
1062533
1259526
937040
1071395
1071393
10126
981987
1230302
1208765
1235103
1176971
1176714
1165142
1207855
1146588
1041237
1116423
235009
1202961
1132368
1100533
1096219
1224190
1136536
4424158
4412433
4606306
4411547
4427973
4598852
4418392
4833245
4209151
4592555
4845437
4812975
4836740
4533232
4592894
4808733
4447418
4153236
4759874
4600400
4773489
4150632
4585649
4786146
4771909
4741977
4744099
4741172
4741416
4582312
4751620
4740867
4700676
4708883
4688600
4686035
4569453
4685021
4586744
4752535
4776680
4776677
4635891
4510716
5071151
5072712
4507266
4563667
5032722
4557613
5027123
5045697
4624161
4503677
4109987
5015010
5008197
5027526
5063403
5043840
4557840
5130771
4331226
4950255
5146425
5165009
5110459
5165325
5128529
5211993
4933079
5163943
4150319
5107931
5107889
5551311
5559086
5575938
5276497
5092572
4950470
5005377
5107526
4922684
5124340
5125222
5287895
5283711
5003845
4098916
5279001
5504407
5536121
5457067
5274149
5274148
5432818
5481332
5459392
5468015
4991760
5459265
5467560
4992491
5462693
5436557
5521571
5450008
5520383
5418627
5438330
5411218
5527004
5395396
4902787
5388377
5394365
5801249
5819660
5801583
5795951
5253620
5768255
5765322
5772914
5775033
4238455
5778229
5762890
4391560
5353372
4884719
5680153
5684183
5651893
5678241
5689612
5686816
4384739
5185620
5662267
5641435
5751857
5588053
6050794
6073200
4874820
5631095
6040593
5588321
5856560
5843747
14233246
14133845
14003121
13621144
18894648

## Sheet: (cannabis OR marijuana) AND sch
(cannabis OR marijuana) AND schizophrenia
29156427
28967348
29279246
29273271
29247465
29254657
29218823
29096386
28965815
29179576
29191570
29146020
29137869
29117908
29045249
29092669
29075884
28498796
29063964
28981842
29066258
29065847
29052952
28762233
25367167
29039260
28443616
28272498
28464965
27782768
28965780
28634109
28392266
28900286
28888362
28419656
29098186
28796120
28953820
28949308
28595088
28843438
28822116
28823723
29083450
28238173
28648138
28648819
28482196
28249639
28788104
28758944
28735586
28717382
28697856
28192643
27612527
28402427
28441618
28395229
28166863
28969353
28065484
28314070
27426892
28446040
28318911
28230072
27989645
28340425
28506704
28487076
28639495
28103519
27639448
27481827
28427930
28548575
28283211
28185872
28138895
28152399
28142064
27928975
28351544
28285022
28004866
27766914
28317509
28236096
28029515
27590573
28112021
28190094
27605579
26733534
27367612
28086176
28115737
28111843
28086792
27618739
27889374
27964871
28075172
27804883
28836486
26768595
28260775
27884751
27789118
28065291
27539930
26875104
27591408
27877130
27490838
27809671
27235082
27534999
27033329
27639959
27637389
27745717
28740820
27998264
27567466
27523641
27554198
27499362
27374322
27733830
27592556
27267317
27835727
26884547
27289213
27621706
27574527
27513670
27536254
27536110
27131780
27161263
26182894
27209524
27161760
27416026
27015036
27261670
27710762
27074536
27138828
27335358
27187893
26345478
27254841
24957110
27769348
27073049
27016880
27147666
27028160
26392629
26598973
26970363
26850792
26698193
26549491
26386480
26210060
27227239
26963912
26286531
26903256
28360758
25982082
26610039
26621349
26785806
26450936
26781550
26674214
26510449
26346639
26467909
26630993
26793128
26858993
27086601
27568729
27549375
28492376
27089154
27019754
26328910
26313367
26370602
27744435
26294706
26682958
26260950
26626949
26692885
26287433
26475577
26522870
26859583
28760562
26581281
26553191
26555499
26411531
26316595
25972235
26308966
26308765
26093170
26311150
25959502
26359848
26235754
26235479
26398733
26388066
25760303
25990303
26277044
26236007
26188167
25829376
26154815
26071625
26003508
26295084
26068702
25979516
26083394
25957927
25727300
25943166
25801289
25680837
26202542
26303540
25654244
26300595
26014623
24274357
25439854
25714896
25510948
26360274
26360273
26360272
26156821
25818628
25680767
25779033
25927125
23491968
26124519
25460036
25825416
25790002
25805986
25739398
25662704
25768856
25586398
25751443
25552590
25667194
25600549
25518844
25510926
25467541
25653831
25285897
25287883
25431432
25801838
25532865
25541346
25284334
25174270
25600541
26417473
26357916
25716487
24990397
26398921
25985611
25277095
25219611
25175914
25439055
27226947
24709224
24792218
24485144
25065407
25458864
25477825
24819935
23879875
26361199
24957864
25036610
24804834
25717480
25618402
25314586
25590545
25107849
24878296
25268256
25309363
25092427
24913137
25242813
25242812
24682777
24343109
25055170
25037524
25419516
24509089
24846537
24924403
24875171
24755307
25076916
24380726
24239593
23916409
23311613
24646809
23884348
23734059
24842540
24831390
25767748
24854329
24630433
24904437
24904434
24860514
24628830
24589980
24385130
24685822
24813404
24605939
24676043
24636304
24630137
24286498
24461684
24398065
23830666
23820822
25187052
24472621
26427297
24565363
24576402
24157087
24382686
24200867
24418217
24495605
24342821
24388728
24524169
24164891
23701858
24128684
24427139
23829369
23829368
23829367
24309088
24574553
24762642
23867051
25372557
25391710
25392292
25392062
25391280
25176118
25345211
25471704
24839596
23590927
23551851
23461899
24741787
24333005
24309013
24275582
24927026
24139960
23330571
23580110
24483000
23670023
23822951
23628741
23000300
24268936
24200416
24189290
24054726
23919899
24246436
24085610
23822952
23756588
24072808
23969281
23906663
24204649
24155701
24131511
24133464
24133461
24133460
24092525
24132898
22988983
23820464
23190458
23958486
23932663
23891482
24096775
24027539
24084427
23860356
23628289
23890122
23810133
23746486
23432626
22749891
23818084
23040144
23341473
22624828
23561296
23537477
23673914
23695790
23220619
23458778
23246245
23656852
23461668
23127569
23592072
21054691
23303471
22476511
22850347
23687763
23687758
23687755
23687754
23314189
23369637
23447498
23447438
23177330
22907121
23436669
22226049
22731397
23146560
23386598
22903392
23042939
23109356
23361397
23361396
25860308
23419236
24124774
22782461
23438696
23201308
23178107
23970971
22920791
22796100
23212141
22833579
23188199
22746224
22682680
23139065
23218162
23304882
22511328
22394476
23115554
22520967
22074909
22517380
23429846
22981049
22833577
22385157
22980477
22936195
22929868
22452790
21525167
22847056
22595870
22152121
22402706
22727454
22695256
22591779
21901400
22759464
21704501
22578720
22475382
23738203
22151745
22434221
22707958
21999906
21389110
22654759
24281562
22127397
22394457
22498950
22446566
22381191
22325079
22313726
22362764
23125956
22193527
21557880
21879797
21899795
22336955
22462481
22832859
22675784
22447077
22622252
21908795
20660494
22518096
22311529
22308261
22265363
21926420
22305029
21845389
23185814
21883099
21981788
22213786
22716160
22716159
22716158
22716156
22716155
22716154
22716153
22716152
22716151
22716150
22716149
22716147
22716146
22716145
22716143
22716142
22716137
22716136
22716134
22716133
22239577
23279181
22635302
21768161
22509273
21641123
22137215
22004303
22345360
21999904
22048912
21903664
21466751
21640553
22007164
20388719
21082479
21876221
20223841
21439652
21627977
21665293
21636134
21851228
21877303
21800361
21296361
21530584
21624823
21555157
21660879
21678345
21231925
20701826
21513772
21629845
21620159
21172414
21181124
21420833
21420282
21388791
21305693
21199447
20851410
21310591
20687106
20813412
21556280
20951979
21036542
20674280
21297046
21078705
21041608
21192149
21029743
20043146
21290620
21267359
21087649
21094294
21196311
23055415
21431002
26954911
25914610
21462790
20955757
20459884
21646823
22937266
20863671
20826079
21092168
21068828
21390411
20435448
20049679
20554292
20237882
20624444
19429842
19386576
20832995
20493536
21061494
21061493
20669315
20963943
20963942
20963941
20945559
20945557
20529414
20018124
19995476
20920183
20542094
20555313
20857802
21089394
20806446
20438810
20653611
20148792
20478874
19785914
19917142
19891810
20571781
20615208
20704767
20483565
20471224
20303714
20514567
20590561
19824986
19703937
20536971
21856620
20512271
20512269
20512267
20122742
20233914
20420097
20370967
20152293
20232511
20396427
20218784
20146152
19997844
19962862
19923008
20802980
21312410
20954427
19854030
20132570
21274356
19897342
20391271
20458676
20001415
20141773
19633959
20104292
19947784
19816676
19956405
19910043
19832787
19832786
19797432
19629449
19529920
20333262
19539765
19604646
19609589
19572159
20155601
19835316
19553917
19335936
19692163
19640690
19748375
19787023
19396546
19560900
19481424
19183816
19301164
19224107
19393686
19559364
19829990
19589045
21938097
19326102
26953749
19268481
19540408
19324529
18789179
19440079
19582316
19083209
19335660
19349314
19367509
18606046
23034243
18807247
19167194
19194646
18995970
18754005
19046858
18805673
20641388
19154519
19059508
19689331
21104393
19155808
20351792
19629024
19353945
18953330
19016094
18585009
18809298
18774264
18575790
19085437
18981338
18981337
18698000
18844804
18791076
18723841
18829891
19073418
19073416
18768298
18701256
18796281
18185500
18485264
18070373
18005495
18833429
18787592
18847572
18847570
21352151
18544469
18499406
18666905
18387788
18646115
18489616
18606950
18590475
18806235
18228005
18514488
18654956
18482435
18261715
18505621
18616861
18717266
18473254
18308802
18358595
18381910
18281413
18378995
17694435
18332661
18278990
18298878
18298877
18298876
18227083
17614260
20641836
18248793
20641952
18253984
17897720
18161645
19062350
18305305
19080993
17532864
18787359
18779773
18362877
17689929
18443664
18560513
18055942
17076936
18162026
18039298
17884351
17683911
17901909
17905522
19588030
17924247
17924240
17978319
17921757
17596918
17337748
17826035
17828652
18357854
17927477
17314920
17767429
18282438
17720033
17630260
17684555
17380464
17566707
17567400
17661193
17653295
17288638
17556751
17462864
17482741
17239356
17131214
17333138
17383738
17508295
17240501
17415074
17368620
17379482
17363221
17328888
17362293
17362287
17362286
17403982
17289155
20641838
20641257
17401783
17329743
17374302
17306720
17222264
17370785
17207121
17691420
17902120
19166390
18286801
17851245
17349865
17245472
17305103
17895537
17561673
18633810
27397348
27397345
27397344
27397264
17170166
17201620
17197373
17005373
17118250
17650749
17019571
17012692
17119509
17119495
16854250
17081075
16401651
16806837
16750347
16861487
17007222
16980745
16870961
16834826
16710682
16174673
16650735
16775133
16540246
16783814
16705205
16716843
16710113
16612208
16585472
16612464
16581402
16052245
16434104
16536885
16531099
16556300
16595355
16513893
16507965
16649818
16550145
16236415
16536662
16460917
16143410
16640112
17058779
16636640
16603458
16319402
16335031
16198238
16005613
15964178
16266285
16396425
16262591
16005471
16178711
15976013
15947217
16018929
15820332
15866551
15995876
15892983
15682431
15900804
15721218
15780846
16639166
15845098
15871146
15705356
15677616
15677615
15643106
15698675
15801394
15801393
16060598
16060596
15698507
16107180
15561482
15763748
15613777
15290005
15500971
15611887
15586309
15374573
15517706
15493085
15493084
21206788
15381886
15173844
15363608
15233568
15787208
15517070
15049742
15038805
15298320
15051110
14984893
14984874
15204665
14992976
14751433
15057028
15057830
14754822
15112899
15061244
15052390
15521792
15022049
14640935
14870957
14626837
14557527
14710532
12975685
12944690
12821204
12957220
12780467
12773606
12876543
14509056
13130354
12679236
12663845
12505141
12952500
12908181
12640322
12587850
12446537
12446534
12439834
12225495
12197863
12457020
12116185
12003681
12206280
12053879
12111342
12027532
11950549
11939970
12028938
11817767
11972143
12008906
11850048
12145839
12459816
11803524
11731353
11504141
11566433
11783563
11584686
11576758
11686057
11377922
11549932
11606002
11399112
11295320
11383976
11315227
11476262
11257236
11229997
11278156
11157424
11258162
11136641
11760925
11311783
15111259
11839138
11090297
11127422
11015816
11037376
11103679
15990489
11204352
10954410
10979421
10881971
10951902
10837858
10829325
10934573
10860095
11185941
10653215
10755680
10575283
10427612
10501554
10394036
10375153
10091967
10190230
10190224
9988095
10189516
10195343
10221641
16203510
9783351
9713909
11281947
9754842
9803615
9623096
9623095
9604530
9718636
9519107
9477606
9340658
9171804
9055141
9070006
9224907
9040528
9212605
9165632
9165630
9050118
8854296
8794495
8811260
8706627
8704453
8719500
8710994
7561817
7480371
7658768
7484303
7626673
7609813
7632625
7734249
8541933
7625979
7631177
7481568
8658102
7994524
21743686
8050773
8201306
8009723
7921721
7932287
7932286
8161287
8187482
8147425
7995319
8125459
7905284
8075903
8372691
8480822
8149120
8444435
8477216
8435708
1358394
1362227
1352565
1641497
1591584
1615105
1313532
1561561
1349241
1543037
1546548
1792558
1687233
2017910
1987823
1746501
1783500
2275472
2218786
2245273
2221283
2204462
2088354
1970451
2333480
2746193
2787581
2597866
2785829
2763984
2631145
2814375
2896812
2894528
2852450
3265029
2892048
3316490
3493059
3489951
3488781
3013386
3092086
3873170
6147913
6142585
6148769
6136485
6635638
6618409
6136096
6300320
6129463
6983205
7180617
7354011
29496
999986
1051411
999496
1259526
937040
1071395
981987
235009
1202961
1224190
4153266
4427973
4528692
4808733
4153236
4469359
4600400
4773489
4752535
4776680
4776677
5072712
5032722
5082076
4565972
4645116
5043840
4575598
5559086
5554511
4274994
5457067
5436557
5422293
5438330
5278386
5527004
5394365
5801249
5795356
5801583
5768255
5765322
5762890
5250309
5684654
5694779
5651893
5751857
6050794
14133845
14003121
